# Supplementary material
Source: PubMed Central journal article supplement (PMC4159721)
Supplement: NIHMS616715-supplement-supplement_1.pdf [file NIHMS616715-supplement-supplement_1.pdf]

Supplementary Table 1. Correlations between hospital variables and the HCAHPS question “What would you rate your hospital?”

|                                                               | <b>Correlation with<br/>Hospital Rating 9 or 10</b>                                                                          | <b>p-value</b> |
|---------------------------------------------------------------|------------------------------------------------------------------------------------------------------------------------------|----------------|
| <b>Hospital Size</b>                                          | <b>positive--</b><br>Increase in bed # correlates with increased likelihood to rate 9 or 10                                  | 0.007          |
| <b>Operative Volume</b>                                       | <b>positive--</b><br>Increase in volume correlates with increased likelihood to rate 9 or 10                                 | < 0.001        |
| <b>Mortality</b>                                              | <b>negative--</b><br>As % deaths decrease, correlates with increased likelihood of rate 9 or 10                              | 0.023          |
| <b>Mortality Index</b>                                        | <b>negative --</b><br>Decrease in mortality index correlates with increased likelihood to rate 9 or 10                       | 0.016          |
| <b>Early Mortality</b>                                        | <b>negative --</b><br>Decreased % early deaths correlates with increased likelihood to rate 9 or 10                          | 0.010          |
| <b>30 Day Readmission Rate<br/>(All cause)</b>                | <b>positive --</b><br>Increase in readmission # increases likelihood to rate 9 or 10                                         | 0.010          |
| <b>30 Day Readmission Rate<br/>(Related)</b>                  | <b>positive --</b><br>Increase in 30 day readmission increases likelihood to rate 9 or 10                                    | 0.012          |
| <b>SCIP Inf-1<br/>Timing of Antibiotic<br/>Administration</b> | <b>positive --</b><br>increasing compliance with antibiotic timing measure increases likelihood of rating 9 or 10            | 0.001          |
| <b>SCIP Inf-4<br/>Cardiac Blood Glucose<br/>Control</b>       | <b>positive --</b><br>Increase in compliance with blood glucose control correlates with increased likelihood to rate 9 or 10 | 0.005          |
